# Supplementary material
Source: Springer Nature journal article supplement (https://www.springermedizin.de/resource/supplementary/12958_2012_1060_MOESM5_ESM.pdf/9566626)

□  $\Delta[\text{Na}^+]/[\text{K}^+]$ -ratio in  $t_1$  urine

■  $\Delta[\text{Na}^+]/[\text{K}^+]$ -ratio in  $t_3$  urine

**A**

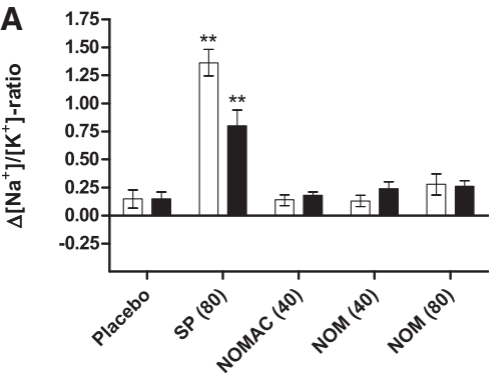

**B**

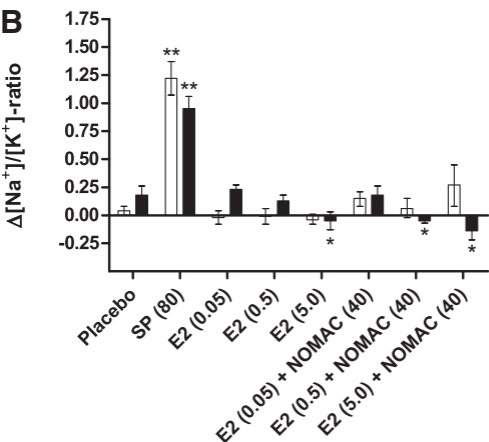

**C**

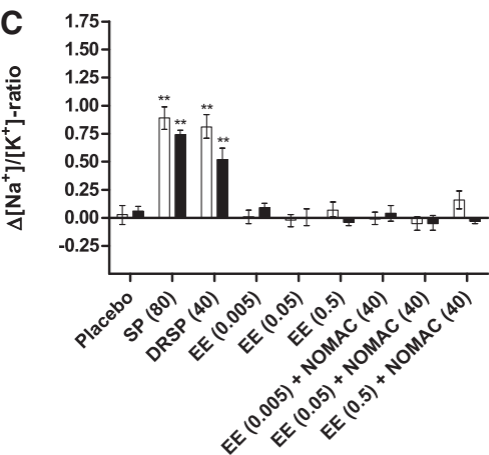

Supplement: MOESM5 [file 9566626]
